# Supplementary material for: IL-17B/RB Activation in Pancreatic Stellate Cells Promotes Pancreatic Cancer Metabolism and Growth
Source: MDPI journal article supplement (doi:10.3390/cancers13215338), 2021-10-24
Supplement: s1 [file s1]

**A**

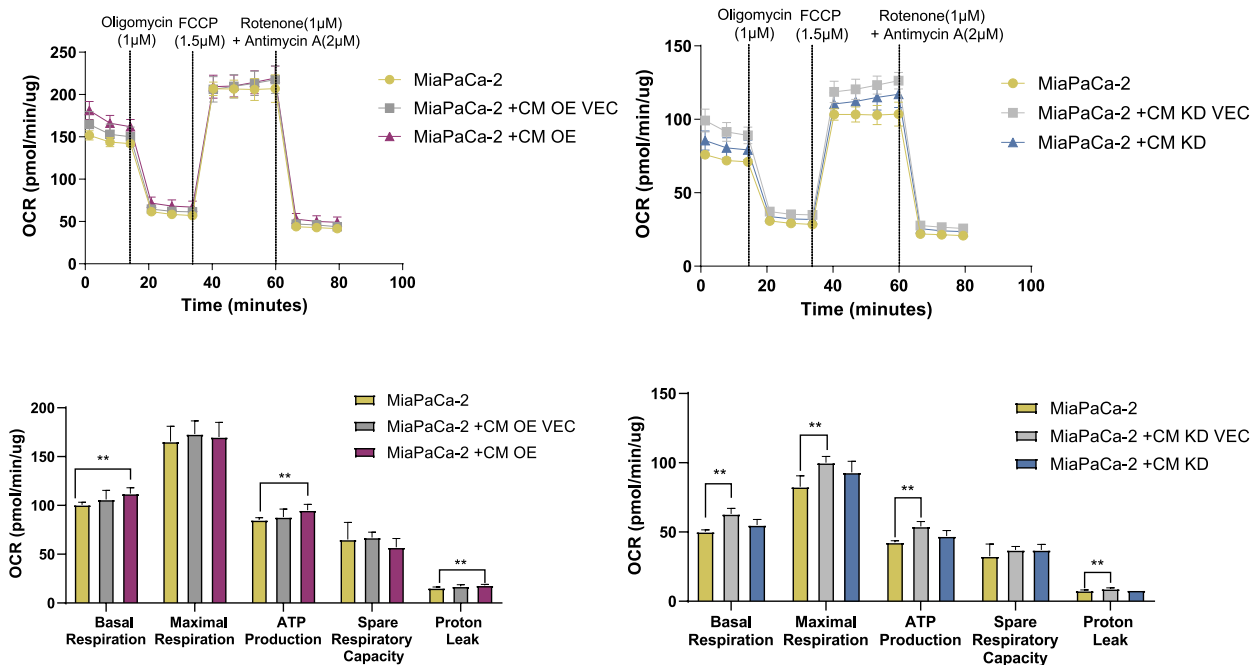

**B**

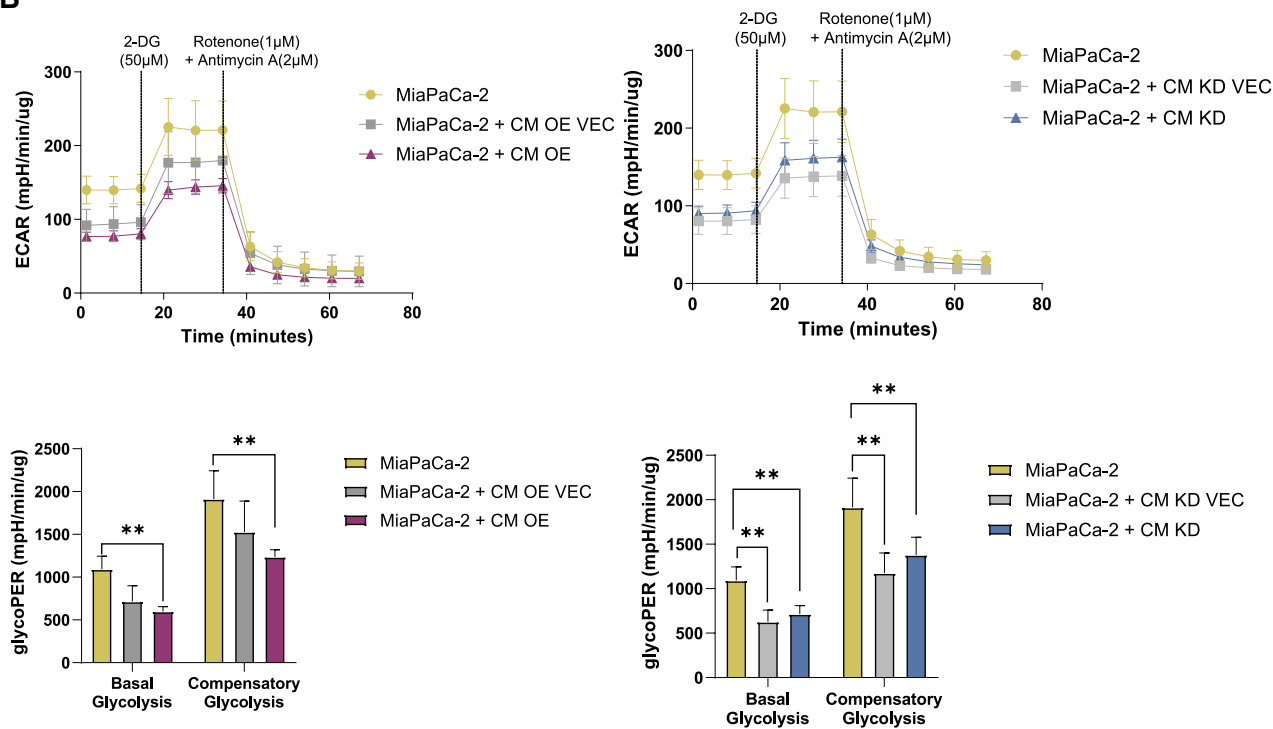

Figure S1. IL-17RB overexpressing PSCs increase mitochondrial respiration and decrease glycolysis - same experiments as in Figure 5 with Mia PaCa-2 tumor cells.
