# Supplementary material for: IL-17B/RB Activation in Pancreatic Stellate Cells Promotes Pancreatic Cancer Metabolism and Growth
Source: MDPI journal article supplement (doi:10.3390/cancers13215338), 2021-10-24
Supplement: s1 [file s1]

**A**

**IL-6 protein expression in RLT-PSC**

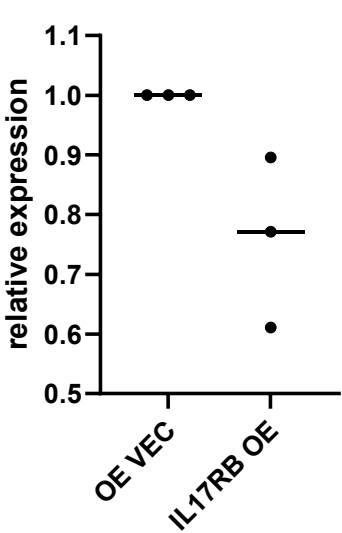

**IL-6 protein expression in RLT-PSC**

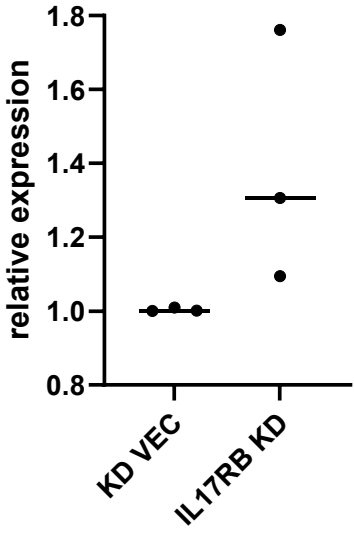

**pMFF protein expression in RLT-PSC**

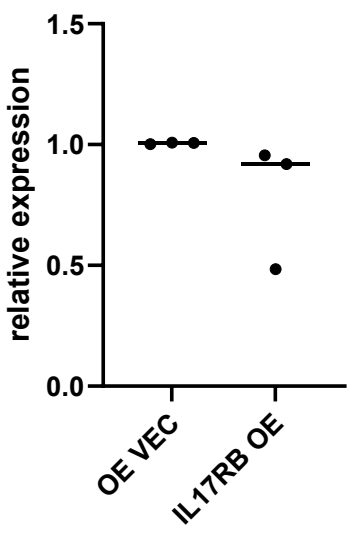

**pMFF protein expression in RLT-PSC**

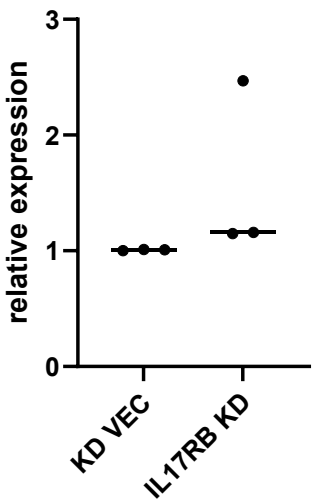

**Drp1 protein expression in RLT-PSC**

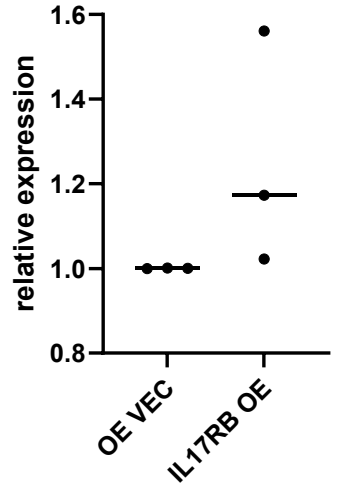

**Drp1 protein expression in RLT-PSC**

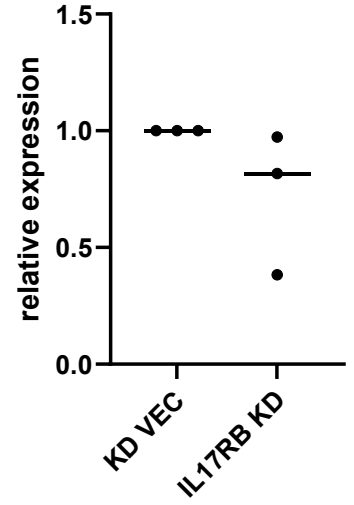

**MFN2 protein expression in RLT-PSC**

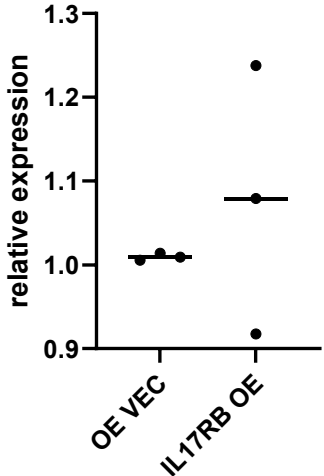

**MFN2 protein expression in RLT-PSC**

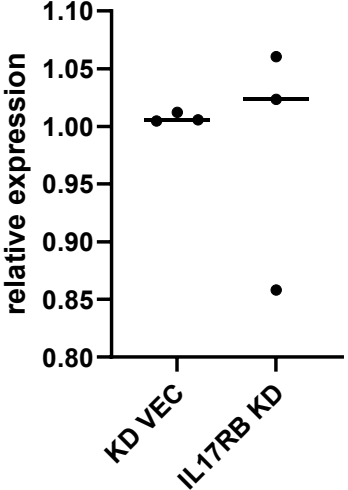

$\alpha$ -SMA protein expression in RLT-PSC

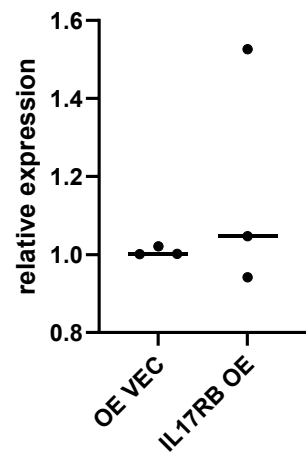

$\alpha$ -SMA protein expression in RLT-PSC

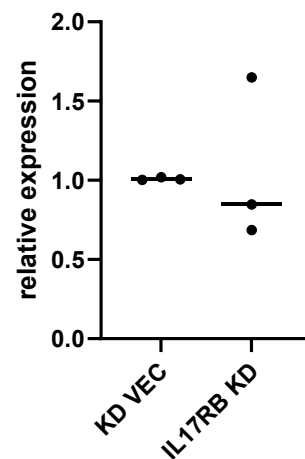

p62 protein expression in RLT-PSC

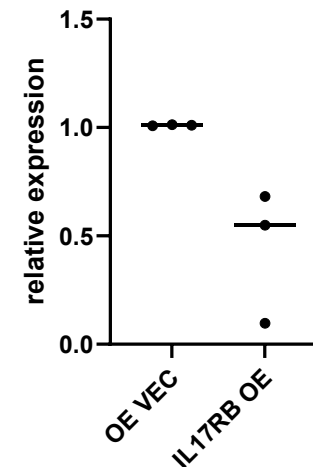

p62 protein expression in RLT-PSC

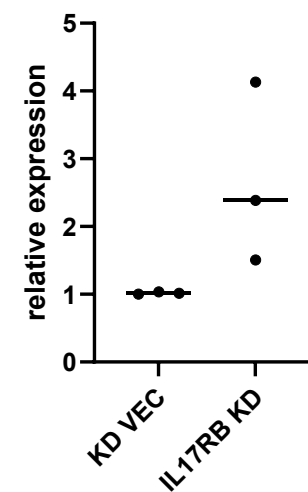

prk8 protein expression in RLT-PSC

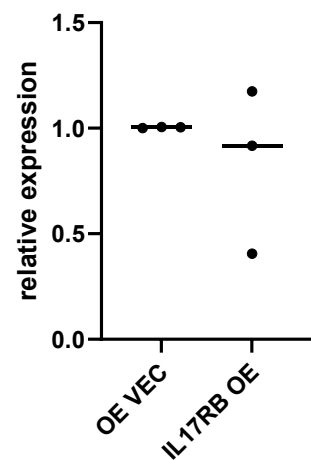

prk8 protein expression in RLT-PSC

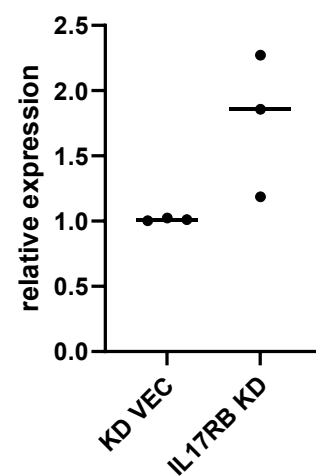

Beclin1 protein expression in RLT-PSC

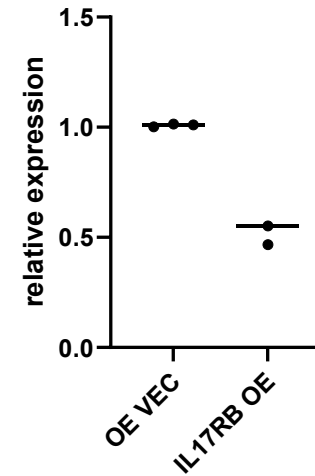

Beclin1 protein expression in RLT-PSC

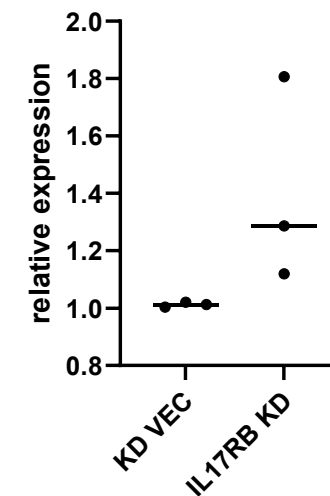

pSTAT3 expression in MiaPaCa-2

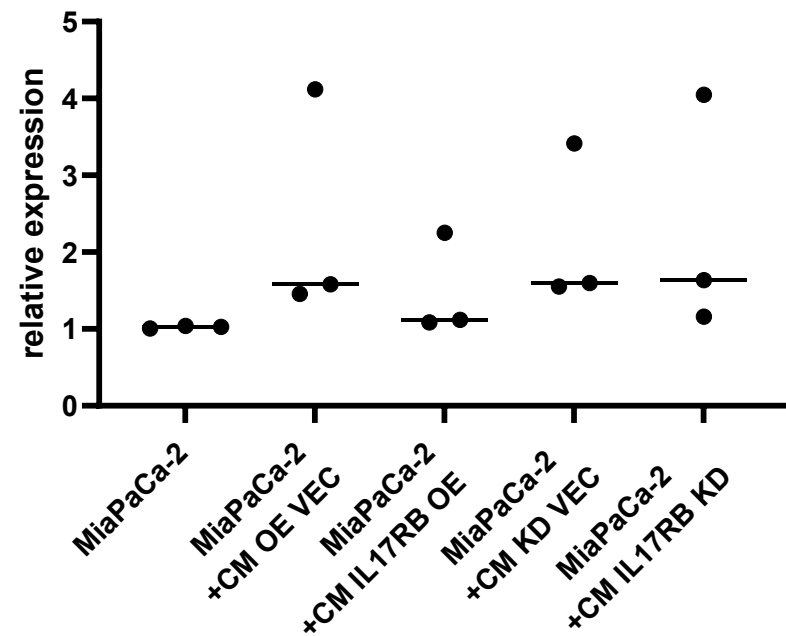

Hex2 protein expression in MiaPaCa-2

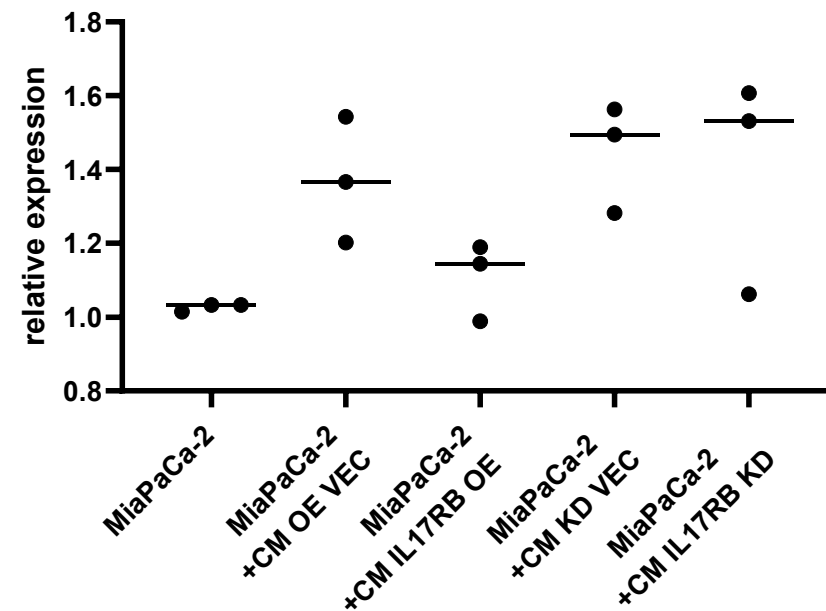

# Original Western Blot data

B

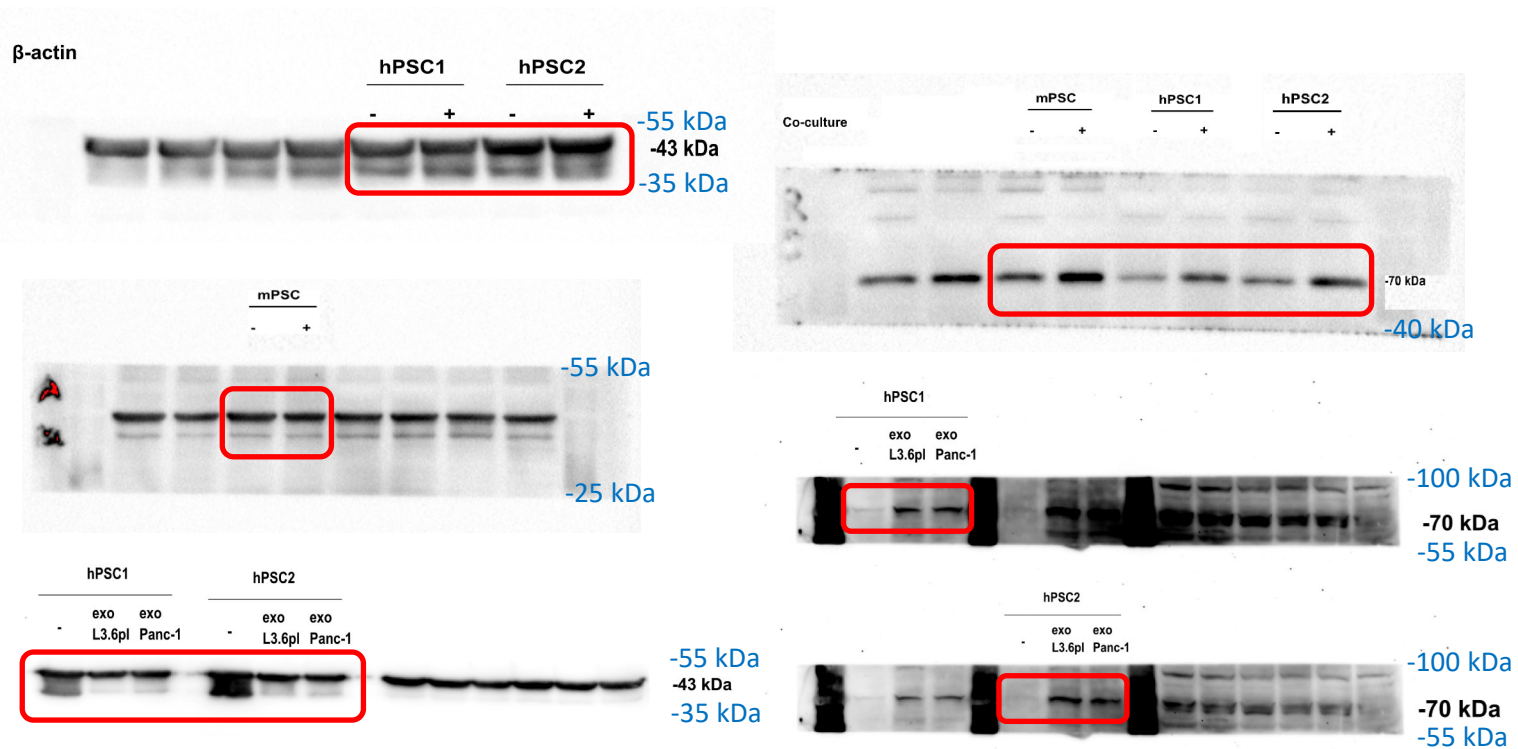

**β-Actin**

**IL-17RB**

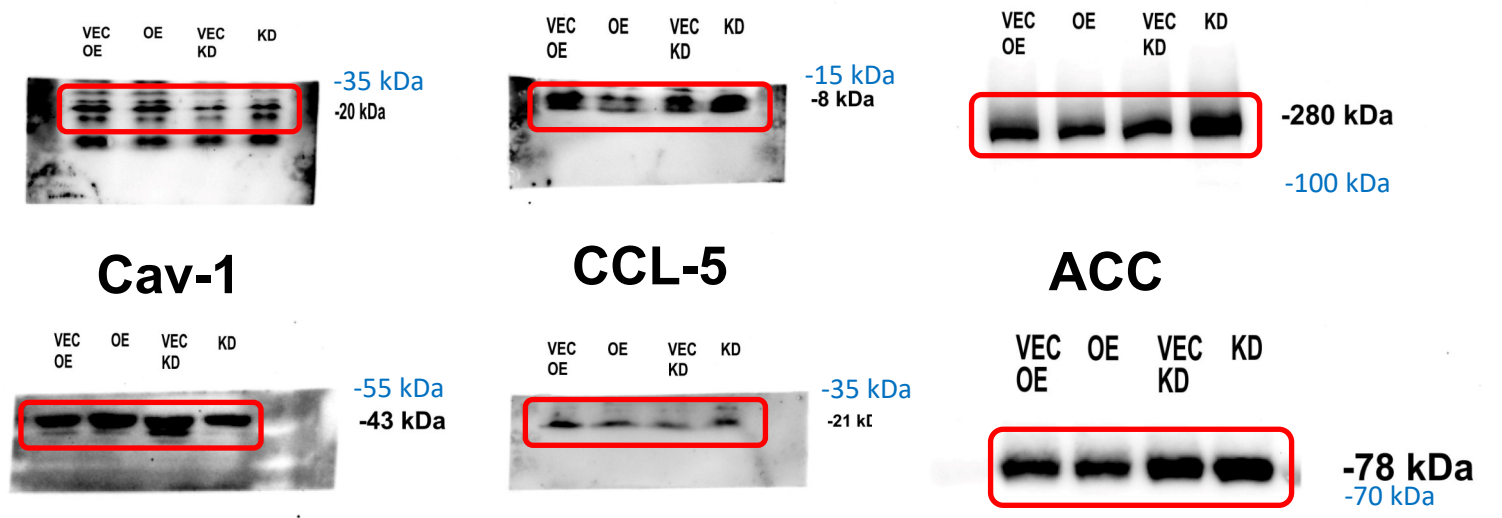

**Cav-1**

**CCL-5**

**ACC**

**α-SMA**

**IL-6**

**ACSL1**

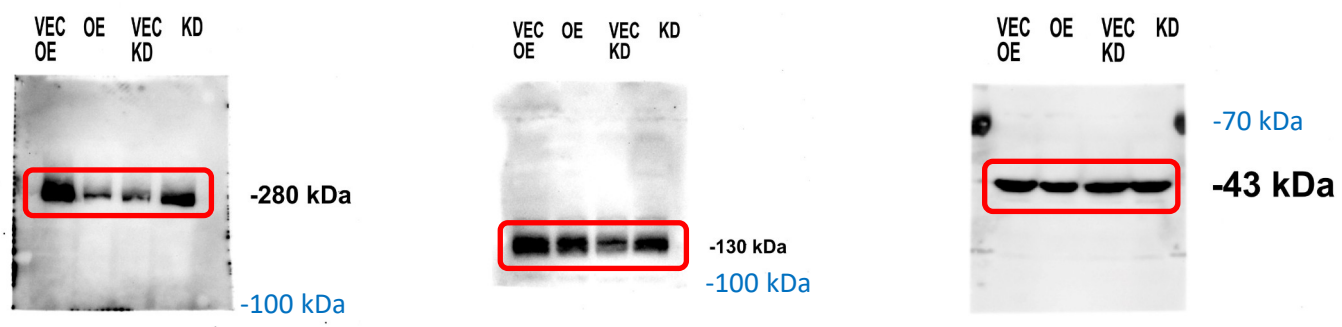

**p-ACC**

**Lipin1**

**β-Actin (d)**

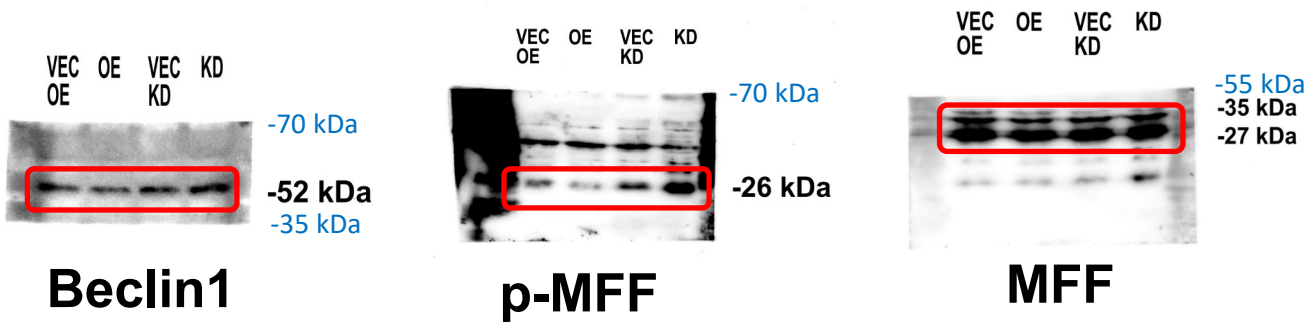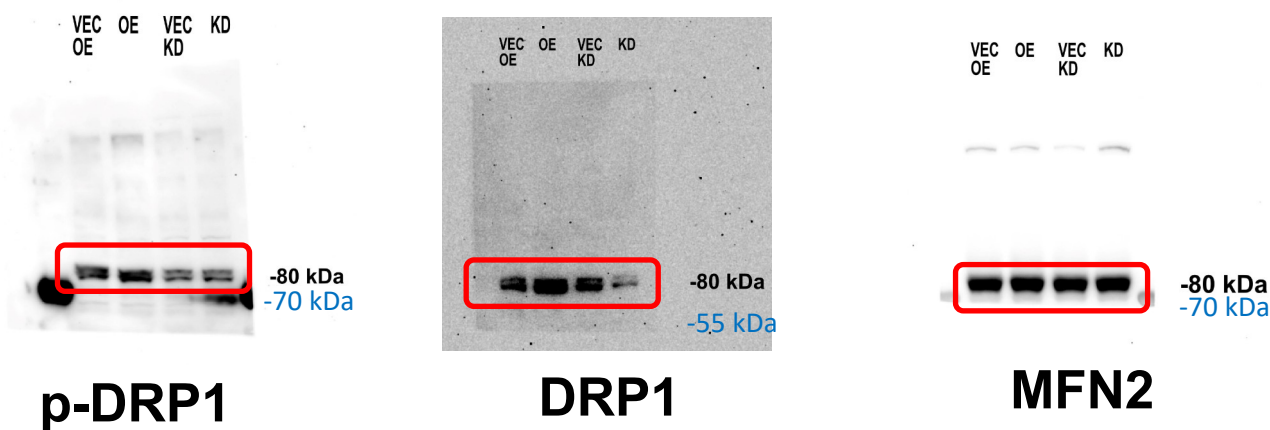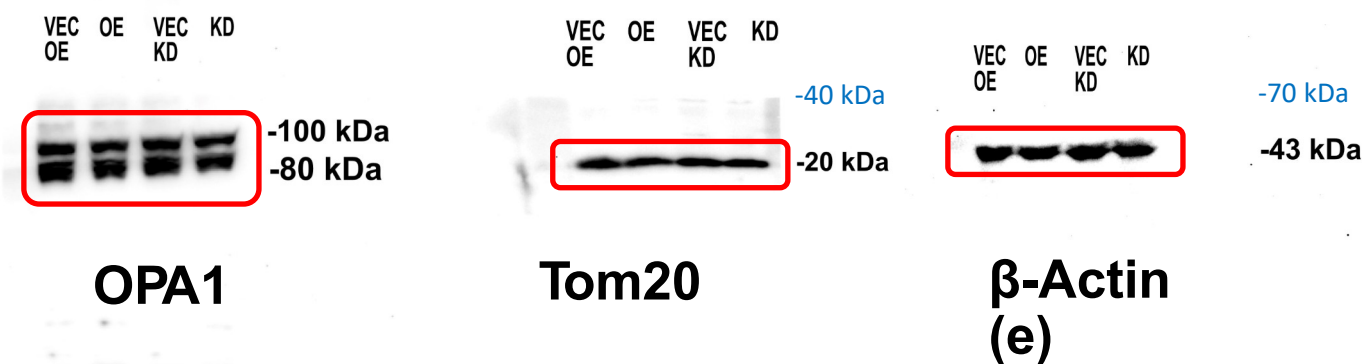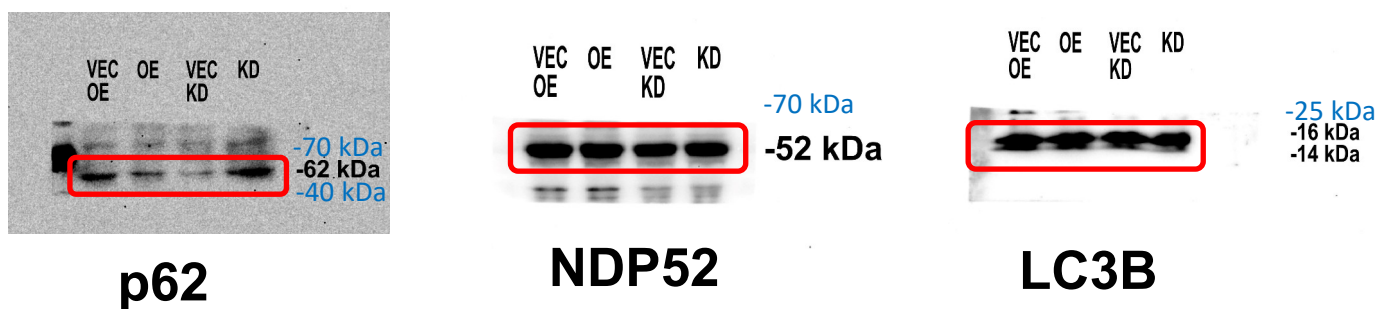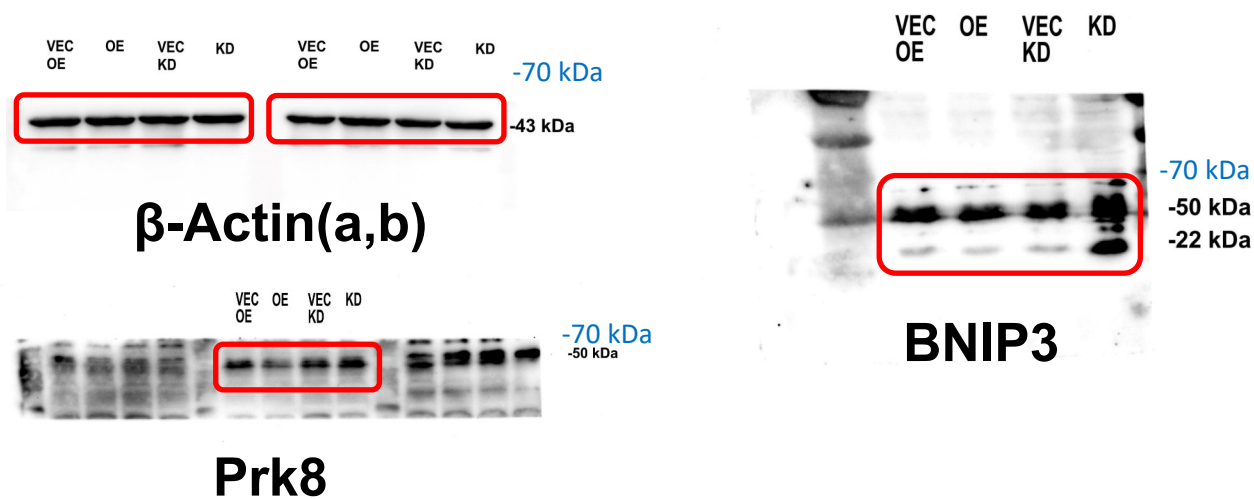

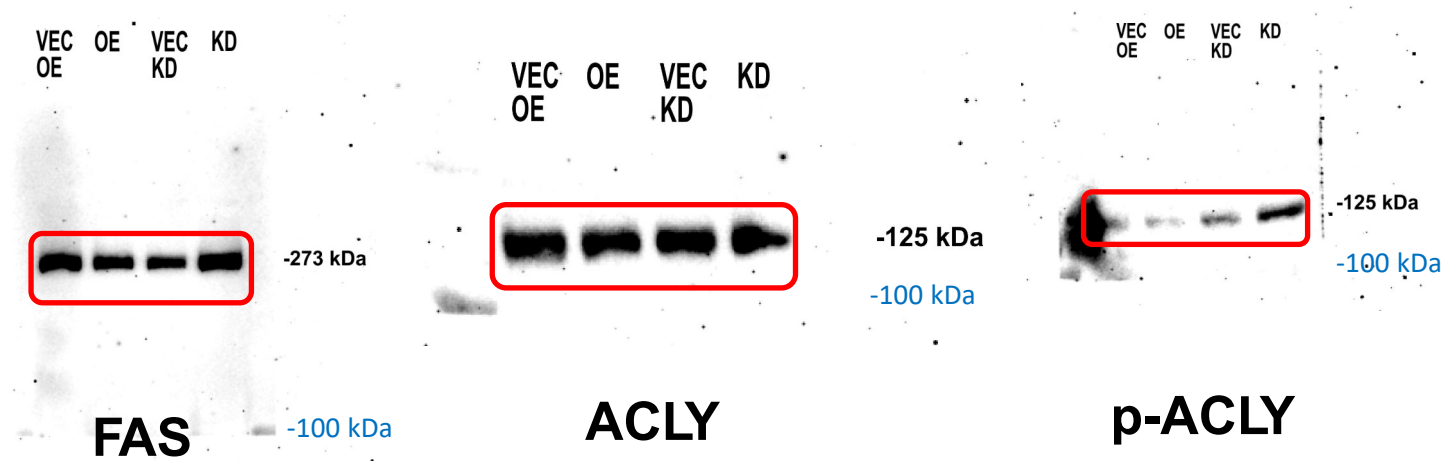

Please replace "hyphen" with "minus" in Figure

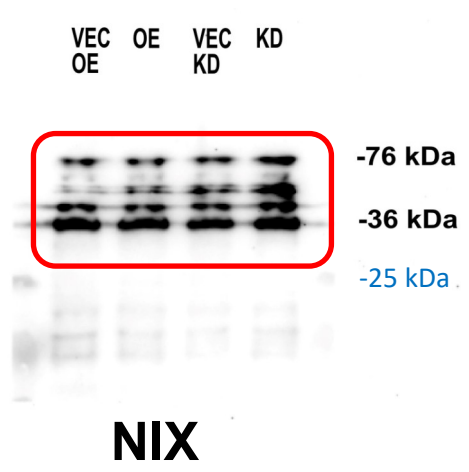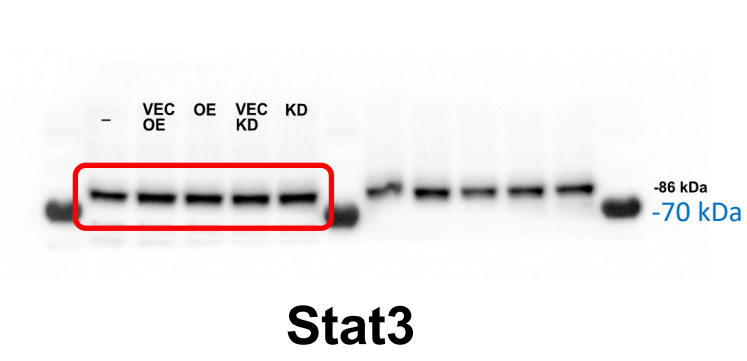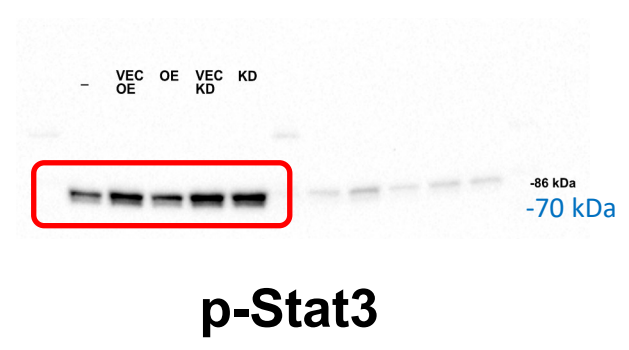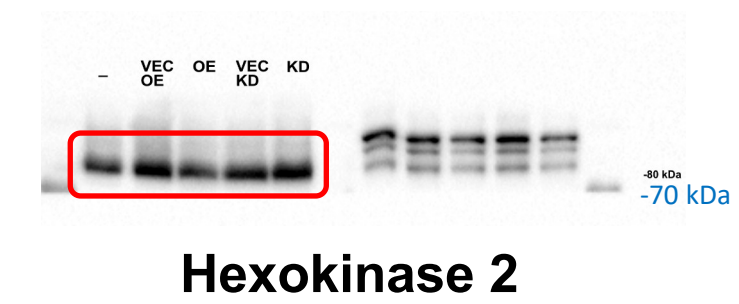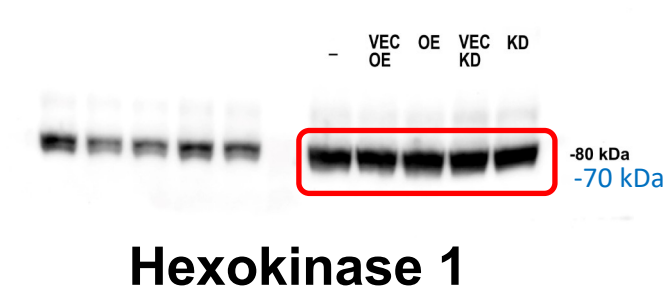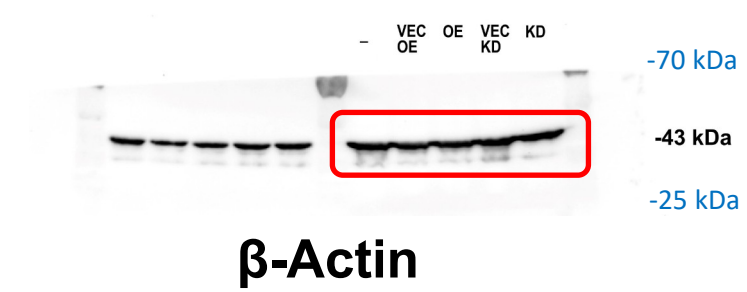

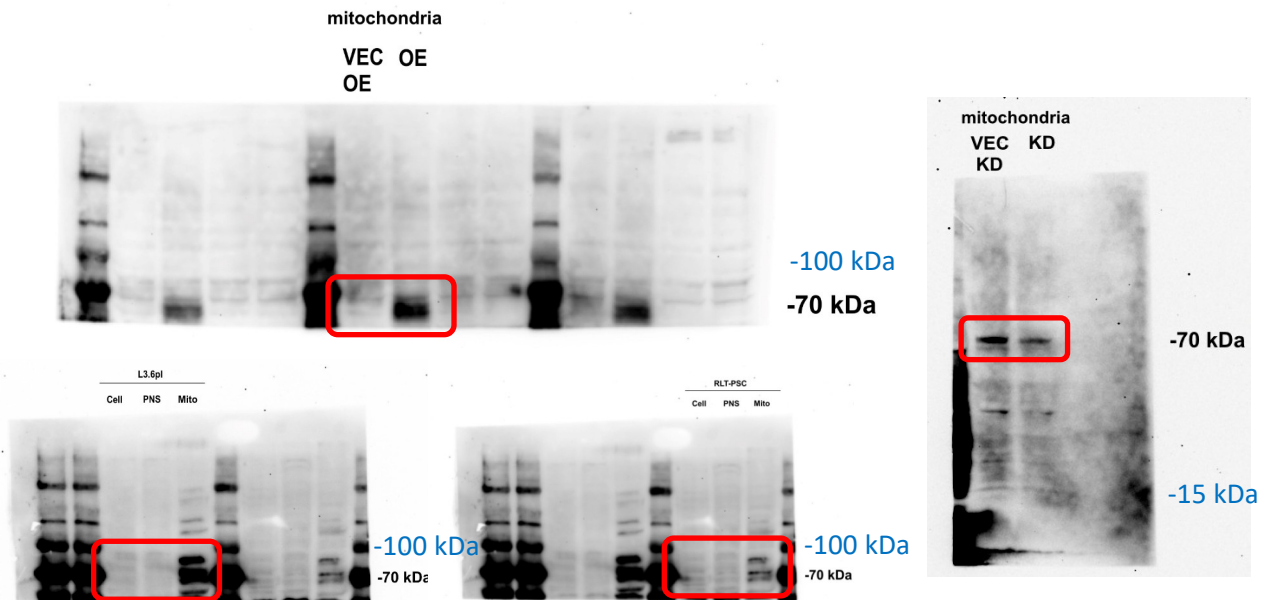

## IL-17RB

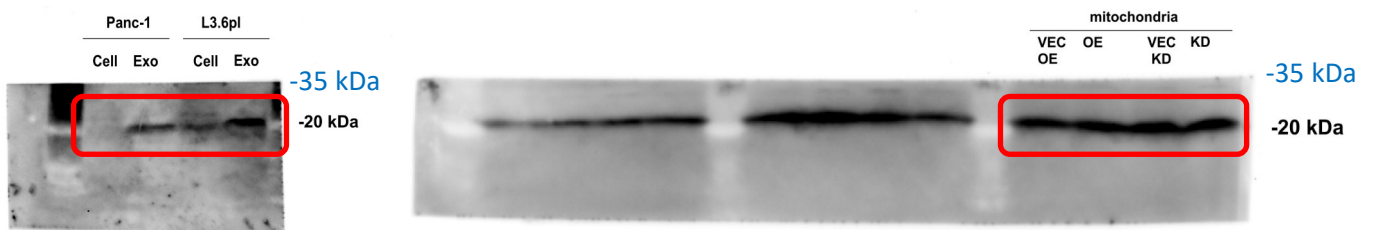

## IL-17B

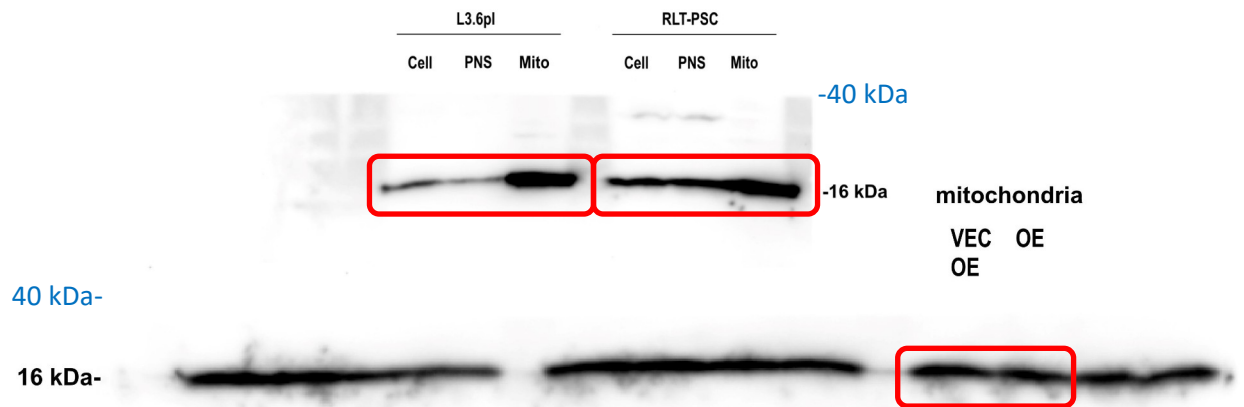

## Tom20

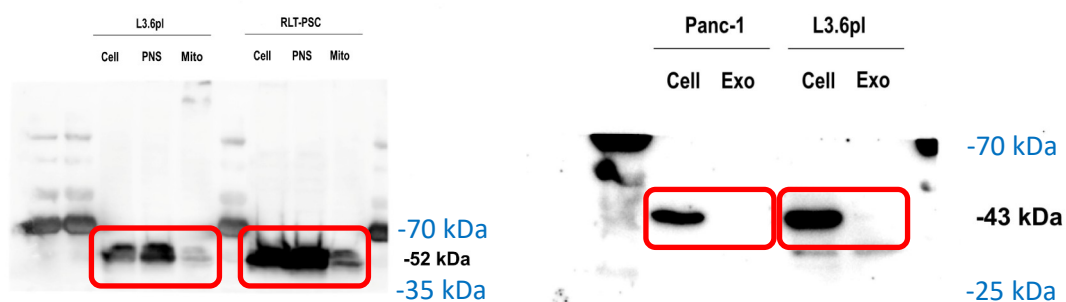

$\alpha$ -Tubulin

$\beta$ -Actin



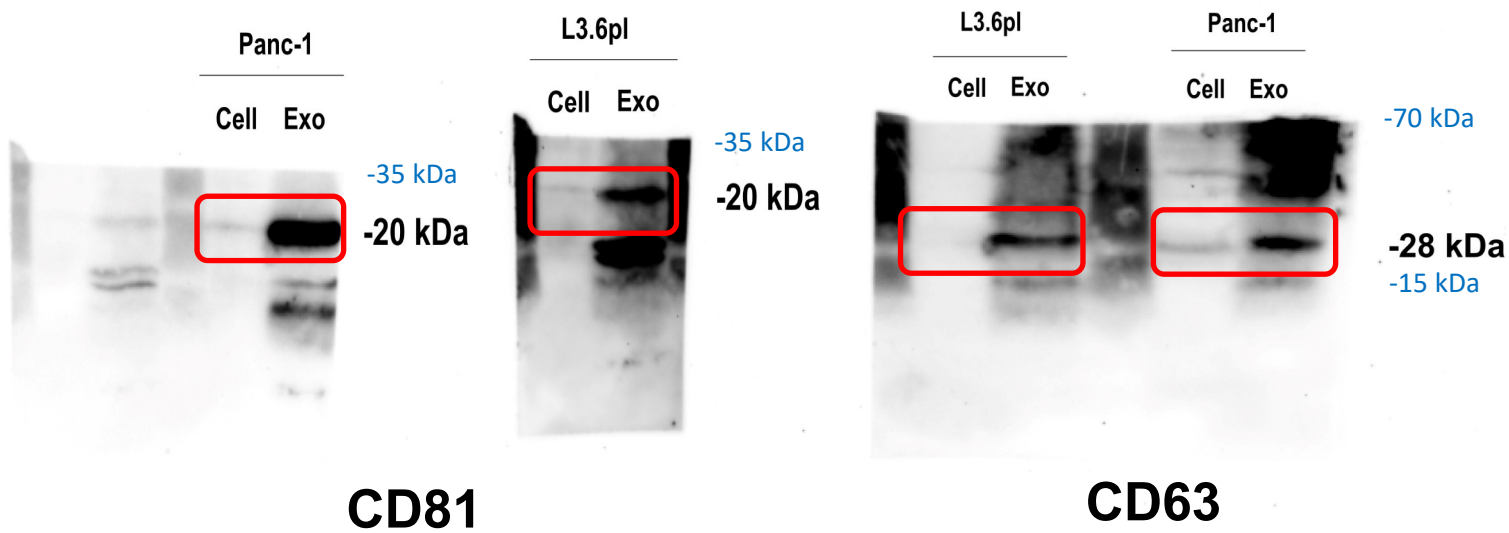

Figure 7.

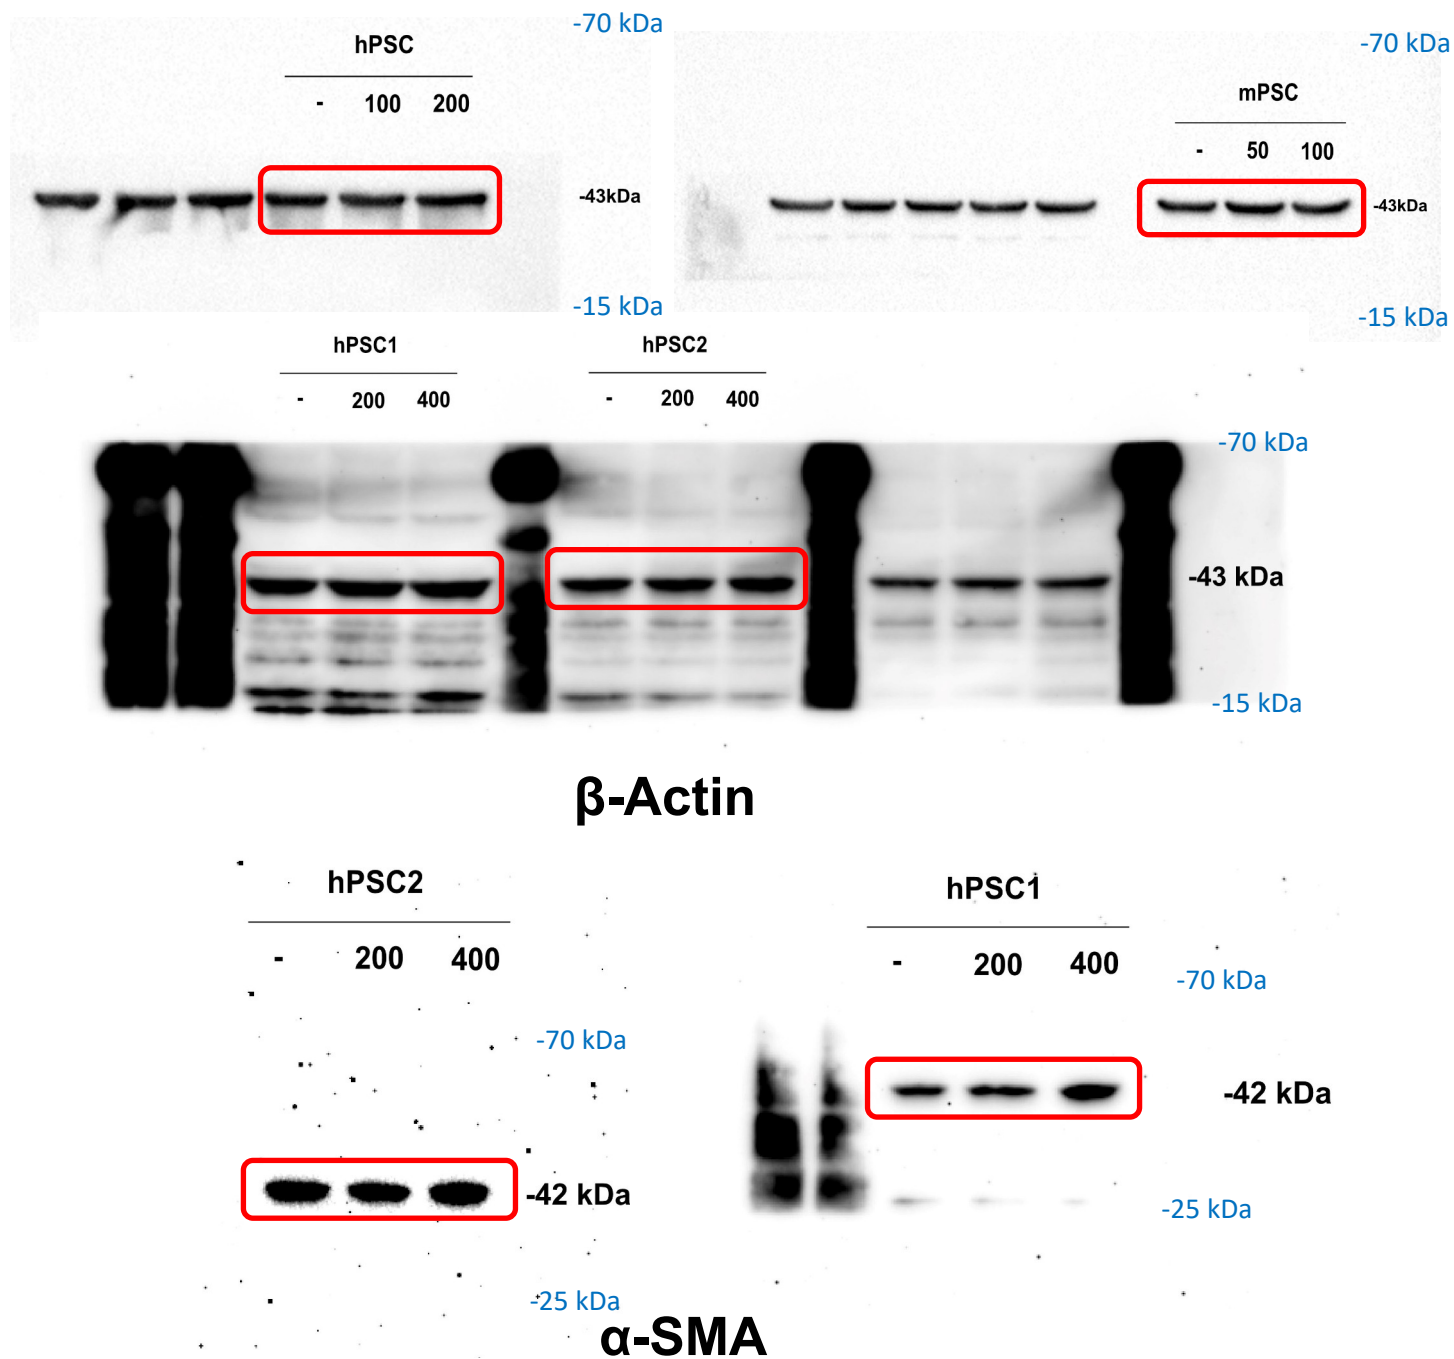



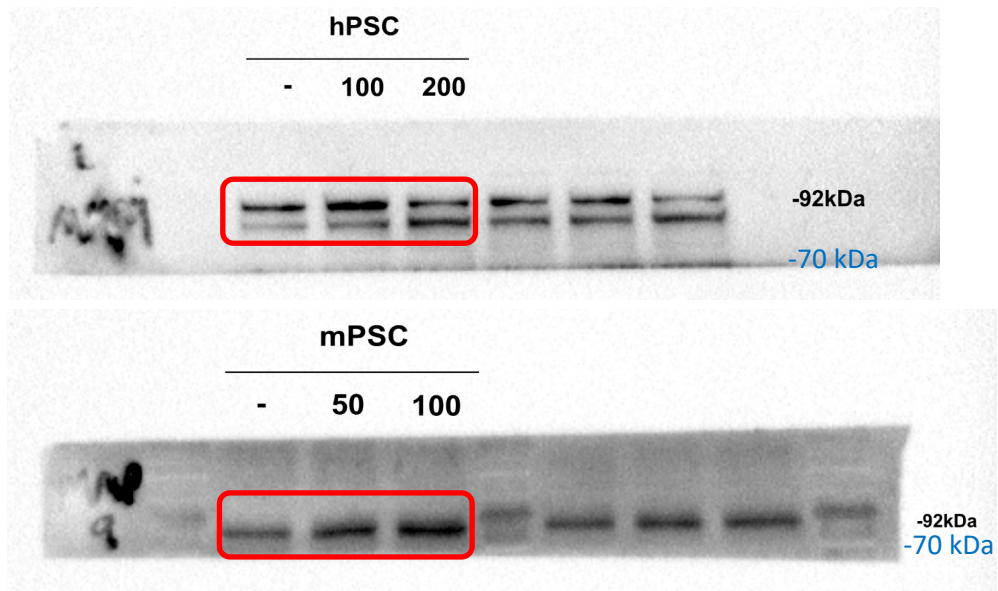

## MMP9

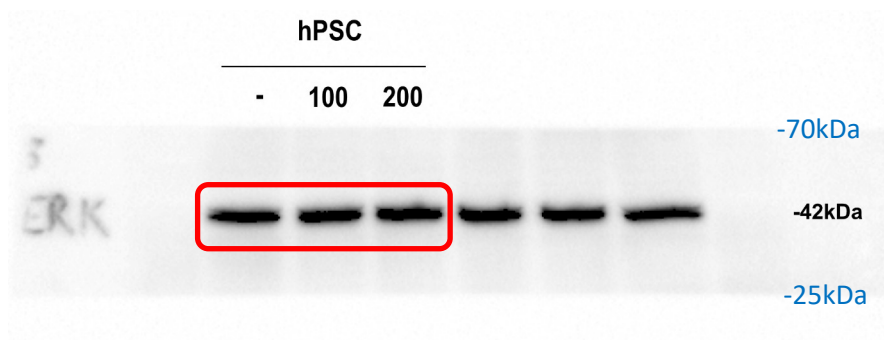

## ERK1/2

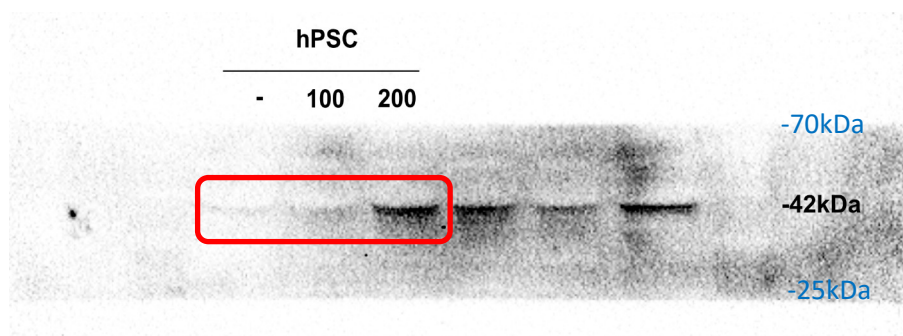

## p-ERK1/2

Figure S2. Quantification of the Western blots.
